# Supplementary material
Source: publisher site journal article supplement (https://www.spandidos-publications.com/6559/downloadSupplementary)
Supplement: Supplementary file 1 [file downloadSupplementary]

Table SI. Details of all antibodies used in the present study.

| Antibody   | Manufacturer                    | Cat. no.   | Dilution               | Molecular weight, kDa |
|------------|---------------------------------|------------|------------------------|-----------------------|
| NCAPD2     | Wuhan Sanying Biotechnology     | 13382-1-AP | WB,1:1,000; IHC, 1:400 | 157                   |
| Ki67       | Maxim Biotechnology             | RMA-0731   | IHC, 1:400             | Not applicable        |
| AKT        | Cell Signaling Technology, Inc. | 4691S      | WB,1:1,000             | 60                    |
| p-AKT      | Cell Signaling Technology, Inc. | 4060S      | WB,1:1,000             | 60                    |
| PI3K       | Cell Signaling Technology, Inc. | 4257S      | WB,1:1,000             | 85                    |
| p-PI3K     | Cell Signaling Technology, Inc. | 4228S      | WB,1:1,000             | 60                    |
| mTOR       | Cell Signaling Technology, Inc. | 2983S      | WB,1:1,000             | 289                   |
| p-mTOR     | Cell Signaling Technology, Inc. | 5536S      | WB,1:1,000             | 289                   |
| c-Myc      | Abcam                           | ab32072    | WB,1:1,000             | 57                    |
| E-cadherin | Cell Signaling Technology, Inc. | 3195S      | WB,1:1,000             | 135                   |
| N-cadherin | Cell Signaling Technology, Inc. | 13116S     | WB,1:1,000             | 140                   |
| Vimentin   | Cell Signaling Technology, Inc. | 5741S      | WB,1:1000              | 57                    |
| GAPDH      | Wuhan Sanying Biotechnology     | 60004-1-Ig | WB,1:50,000            | 36                    |

mTOR, mammalian target of rapamycin; NCAPD2, non-SMC condensin I complex subunit D2; p-, phosphorylated; PI3K, phosphatidylinositol 3-kinase.

Table SII. Sequence information for reverse transcription-quantitative PCR primers and siRNAs.

| Name                 | Sequence, 5'-3'                                                |
|----------------------|----------------------------------------------------------------|
| Human- <i>NCAPD2</i> | F: TCCTGTTGATGAACCTGCTGTCC<br>R: TGGTCTTGTGCTCCTGTTCTTCC       |
| Human- <i>GAPDH</i>  | F:CGGAGTCAACGGATTTGGTCGTATTGG<br>R:GCTCCTGGAAGATGGTGATGGGATTCC |
| si-NCAPD2            | GAACU GUUAU GCUCU GAUATT                                       |
| si-NC                | UUCUC CGAAC GUGUC ACGUTT                                       |

NC, negative control (scramble siRNA); NCAPD2, non-SMC condensin I complex subunit D2; si, small interfering.

Table SIII. Details of the single cell RNA-sequencing datasets used in the present study.

| Dataset name | Species | Samples size | Cell counts <sup>a</sup> | Types | Platform                                   | Year of last submission |
|--------------|---------|--------------|--------------------------|-------|--------------------------------------------|-------------------------|
| GSE140228    | Human   | 41           | 11,134                   | HCC   | GPL20301;Illumina HiSeq 4000, 10x Genomics | 2019                    |
| GSE112271    | Human   | 7            | 31,265                   | HCC   | GPL16791;Illumina HiSeq 2500, 10x Genomics | 2018                    |

<sup>a</sup>In single cell sequencing. HCC, hepatocellular carcinoma.

Table SIV. Association analysis of *NCAPD2* expression and clinicopathological characteristics in patients with liver cancer (n=374).

| Characteristic                | <i>NCAPD2</i> expression |              | P-value             |
|-------------------------------|--------------------------|--------------|---------------------|
|                               | Low (n=187)              | High (n=187) |                     |
| Male sex, n (%)               | 133 (35.6%) <sup>c</sup> | 120 (32.1%)  | 0.151 <sup>a</sup>  |
| Age, n (%)                    |                          |              | 0.004 <sup>a</sup>  |
| ≤60 years                     | 75 (20.1%)               | 102 (27.3%)  |                     |
| >60 years                     | 112 (30%)                | 84 (22.5%)   |                     |
| BMI, n (%)                    |                          |              | 0.071 <sup>a</sup>  |
| ≤25 kg/m <sup>2</sup>         | 81 (24%)                 | 96 (28.5%)   |                     |
| >25 kg/m <sup>2</sup>         | 89 (26.4%)               | 71 (21.1%)   |                     |
| Pathological TNM stage, n (%) |                          |              | 0.012 <sup>a</sup>  |
| Stage I + Stage II            | 138 (39.4%)              | 122 (34.9%)  |                     |
| Stage III + Stage IV          | 34 (9.7%)                | 56 (16%)     |                     |
| Pathological T stage, n (%)   |                          |              | 0.015 <sup>a</sup>  |
| T1 + T2                       | 148 (39.9%)              | 130 (35%)    |                     |
| T3 + T4                       | 36 (9.7%)                | 57 (15.4%)   |                     |
| Pathological N stage, n (%)   |                          |              | 0.739 <sup>b</sup>  |
| N0                            | 117 (45.3%)              | 137 (53.1%)  |                     |
| N1                            | 1 (0.4%)                 | 3 (1.2%)     |                     |
| Pathological M stage, n (%)   |                          |              | 0.553 <sup>b</sup>  |
| M0                            | 127 (46.7%)              | 141 (51.8%)  |                     |
| M1                            | 3 (1.1%)                 | 1 (0.4%)     |                     |
| Histological grade, n (%)     |                          |              | <0.001 <sup>a</sup> |
| Grade 1 + Grade 2             | 140 (37.9%)              | 93 (25.2%)   |                     |
| Grade 3 + Grade 4             | 44 (11.9%)               | 92 (24.9%)   |                     |
| Residual tumor, n (%)         |                          |              | 0.692 <sup>a</sup>  |
| R0                            | 166 (48.1%)              | 161 (46.7%)  |                     |
| R1 + R2                       | 10 (2.9%)                | 8 (2.3%)     |                     |
| AFP, n (%)                    |                          |              | <0.001 <sup>a</sup> |
| ≤400 ng/ml                    | 127 (45.4%)              | 88 (31.4%)   |                     |
| >400 ng/ml                    | 17 (6.1%)                | 48 (17.1%)   |                     |
| Ishak fibrosis score, n (%)   |                          |              | 0.144 <sup>a</sup>  |
| 0-2                           | 64 (29.8%)               | 42 (19.5%)   |                     |
| 3-6                           | 55 (25.6%)               | 54 (25.1%)   |                     |

<sup>a</sup> $\chi^2$  test; <sup>b</sup>Fisher's exact test. <sup>c</sup>Percentage statistics (%) represent the proportion of subtypes in the total number of patients with liver cancer. The total number of patients was <187 for some variables due to the lack of some clinical information. Patients were divided into *NCAPD2* high and low expression groups according to the median cutoff value. AFP,  $\alpha$ -fetoprotein; BMI, body mass index; *NCAPD2*, non-SMC condensin I complex subunit D2.

Table SV. Uni-cox and multi-cox regression analyses of overall survival for *NCAPD2* expression and clinicopathological characteristics in liver cancer.

| Characteristic           | Uni-cox analysis      |                    | Multi-cox analysis    |         |
|--------------------------|-----------------------|--------------------|-----------------------|---------|
|                          | Hazard ratio (95% CI) | P-value            | Hazard ratio (95% CI) | P-value |
| <i>NCAPD2</i> expression | 1.46 (1.23,1.74)      | 1x10 <sup>-5</sup> | 1.48 (1.21,1.83)      | 0.0002  |
| Age                      | 1.02 (0.998,1.03)     | 0.08               |                       |         |
| Sex                      | 0.82 (0.57,1.16)      | 0.26               |                       |         |
| Pathological T stage     | 1.68 (1.40,2.01)      | <0.0001            |                       |         |
| Pathological N stage     | 2.00 (0.49,8.18)      | 0.33               |                       |         |
| Pathological TNM stage   | 1.38 (1.15,1.65)      | 0.00066            | 1.13 (0.43,3.00)      | 0.80    |

Multi-cox; multivariate Cox; *NCAPD2*, non-SMC condensin I complex subunit D2; uni-cox, univariate Cox.
